# Supplementary material for: Sensitive luminescence mechanochromism and unique luminescence thermochromism tuned by bending the P–O–P skeleton in the diphosphonium/iodocuprate(i) hybrid
Source: Royal Society of Chemistry journal article supplement (doi:10.1039/d2ce00408a), 2022-01-01
Supplement: d2ce00408a1.pdf [file d2ce00408a1.pdf]

# Sensitive Luminescent Mechanochromism and Unique Luminescent Thermochromism Tuned by Bending P–O–P Skeleton in Diphosphonium/[Cu<sub>2</sub>I<sub>4</sub>] Hybrid

Zhen–Cong Yang,<sup>a</sup> Kai–Yue Song,<sup>a</sup> Pan–Ke Zhou,<sup>a</sup> Lu–Lu Zong,<sup>a</sup> Hao–Hong Li,<sup>\*ab</sup> Zhi–Rong

Chen<sup>\*ab</sup> and Rong Jiang<sup>a</sup>

<sup>a</sup>College of Chemistry, Fuzhou University, Fuzhou, Fujian, 350108, China. Email:  
lihh@fzu.edu.cn and zrchen@fzu.edu.cn

<sup>b</sup>Fujian Engineering Research Center of Advanced Manufacturing Technology for Fine Chemicals,  
Fuzhou University, Fuzhou, Fujian, 350108, China

Table S1 Crystal data and structure refinements in this work

|                                                               | 1–RT                                                                                          | 1–175K                                                                                        | 2                                                                                             |
|---------------------------------------------------------------|-----------------------------------------------------------------------------------------------|-----------------------------------------------------------------------------------------------|-----------------------------------------------------------------------------------------------|
| Empirical formula                                             | C <sub>24</sub> H <sub>48</sub> Cu <sub>2</sub> I <sub>4</sub> N <sub>6</sub> OP <sub>2</sub> | C <sub>24</sub> H <sub>48</sub> Cu <sub>2</sub> I <sub>4</sub> N <sub>6</sub> OP <sub>2</sub> | C <sub>24</sub> H <sub>48</sub> Cu <sub>4</sub> I <sub>6</sub> N <sub>6</sub> OP <sub>2</sub> |
| Crystal system                                                | Orthorhombic                                                                                  | Orthorhombic                                                                                  | Triclinic                                                                                     |
| Formula mass                                                  | 1133.3                                                                                        | 1133.3                                                                                        | 1514.18                                                                                       |
| Space group                                                   | <i>Pbca</i>                                                                                   | <i>Pbca</i>                                                                                   | <i>P</i> $\bar{1}$                                                                            |
| a[Å]                                                          | 12.9110(7)                                                                                    | 12.7246(7)                                                                                    | 9.7863(7)                                                                                     |
| b[Å]                                                          | 14.3489(8)                                                                                    | 14.1746(7)                                                                                    | 10.7597(8)                                                                                    |
| c[Å]                                                          | 19.9832(11)                                                                                   | 19.8726(11)                                                                                   | 11.0969(8)                                                                                    |
| $\alpha$ /°                                                   | 90                                                                                            | 90                                                                                            | 70.945(3)                                                                                     |
| $\beta$ /°                                                    | 90                                                                                            | 90                                                                                            | 79.753(3)                                                                                     |
| $\gamma$ /°                                                   | 90                                                                                            | 90                                                                                            | 72.218(3)                                                                                     |
| Volume/Å <sup>3</sup>                                         | 3702.1(4)                                                                                     | 3584.3(3)                                                                                     | 1047.71(13)                                                                                   |
| <i>Z</i>                                                      | 4                                                                                             | 4                                                                                             | 1                                                                                             |
| <i>D</i> <sub>c</sub> [g/cm <sup>3</sup> ]                    | 2.033                                                                                         | 2.100                                                                                         | 2.400                                                                                         |
| $\mu$ /mm <sup>-1</sup>                                       | 4.598                                                                                         | 4.749                                                                                         | 6.526                                                                                         |
| F(000)                                                        | 2168                                                                                          | 2168                                                                                          | 706                                                                                           |
| Reflections, total                                            | 117980                                                                                        | 62067                                                                                         | 28837                                                                                         |
| Reflections, unique                                           | 3290 [ <i>R</i> (int) = 0.0787]                                                               | 3169 [ <i>R</i> (int) = 0.0368]                                                               | 3669 [ <i>R</i> (int) = 0.0423]                                                               |
| Reflections, observed                                         | 2644                                                                                          | 2853                                                                                          | 3044                                                                                          |
| Goodness-of-fit on <i>F</i> <sup>2</sup>                      | 1.113                                                                                         | 1.040                                                                                         | 1.102                                                                                         |
| No. of parameters refined                                     | 179                                                                                           | 179                                                                                           | 215                                                                                           |
| <i>R</i> <sub>1</sub> [ <i>I</i> > 2 $\sigma$ ( <i>I</i> )]   | 0.0343                                                                                        | 0.0192                                                                                        | 0.0304                                                                                        |
| w <i>R</i> <sub>2</sub> [ <i>I</i> > 2 $\sigma$ ( <i>I</i> )] | 0.074                                                                                         | 0.0403                                                                                        | 0.0714                                                                                        |

|                                               |              |              |              |
|-----------------------------------------------|--------------|--------------|--------------|
| residual extremes ( $\epsilon/\text{\AA}^3$ ) | 0.876,-0.618 | 0.766,-0.728 | 0.794,-0.655 |
|-----------------------------------------------|--------------|--------------|--------------|

**Table S2 Selected bond lengths ( $\text{\AA}$ ) and angles( $^\circ$ ) of  $(\text{Py}_3\text{P-O-PPy}_3)(\text{Cu}_2\text{I}_4)$  (1)**

| Room temperature              |             |                               |             |                                |             |                               |            |
|-------------------------------|-------------|-------------------------------|-------------|--------------------------------|-------------|-------------------------------|------------|
| Cu(1)-I(1)                    | 2.4850(6)   | Cu(1)-I(2)                    | 2.5758(7)   | Cu(1)-I(2) <sup>#1</sup>       | 2.5757(7)   | Cu(1)-Cu(1) <sup>#1</sup>     | 2.6519(11) |
| P(1)-O(1)                     | 1.5713(11)  | P(1)-N(1)                     | 1.600(4)    | P(1)-N(2)                      | 1.584(4)    | P(1)-N(3)                     | 1.591(3)   |
| I(1)-Cu(1)-I(2) <sup>#1</sup> | 120.58(3)   | I(1)-Cu(1)-I(2)               | 121.38(3)   | I(2) <sup>#1</sup> -Cu(1)-I(2) | 118.03(2)   | P(1) <sup>#2</sup> -O(1)-P(1) | 180.0      |
| Low temperature               |             |                               |             |                                |             |                               |            |
| Cu(1)-I(1)                    | 2.4898(4)   | Cu(1)-I(2)                    | 2.5746(4)   | Cu(1)-I(2) <sup>#1</sup>       | 2.5778(4)   | Cu(1)-Cu(1) <sup>#1</sup>     | 2.5970(7)  |
| P(1)-O(1)                     | 1.5746(7)   | P(1)-N(1)                     | 1.597(2)    | P(1)-N(2)                      | 1.590(3)    | P(1)-N(3)                     | 1.599(2)   |
| I(1)-Cu(1)-I(2)               | 120.426(16) | I(1)-Cu(1)-I(2) <sup>#1</sup> | 120.108(16) | I(2)-Cu(1)-I(2) <sup>#1</sup>  | 119.464(14) | P(1)-O(1)-P(1) <sup>#2</sup>  | 180.0      |

Symmetry codes: #1 -x+1,-y+1,-z; #2 -x+1,-y+1,-z+1

**Table S3 Selected bond lengths ( $\text{\AA}$ ) and angles( $^\circ$ ) of  $(\text{Py}_3\text{P-O-PPy}_3)(\text{Cu}_4\text{I}_6)$  (2)**

|                               |            |                               |            |                               |            |                               |            |
|-------------------------------|------------|-------------------------------|------------|-------------------------------|------------|-------------------------------|------------|
| Cu(1)-I(1)                    | 2.5682(14) | Cu(1)-I(2)                    | 2.5752(14) | Cu(1)-I(3)                    | 2.5677(14) | Cu(2)-I(1) <sup>#1</sup>      | 2.5834(14) |
| Cu(2)-I(3)                    | 2.5546(14) | Cu(2)-I(2)                    | 2.5567(15) | Cu(3)-I(1)                    | 2.5389(15) | Cu(3)-I(2) <sup>#1</sup>      | 2.6024(15) |
| Cu(3)-I(3)                    | 2.5613(15) | Cu(4)-I(1)                    | 2.5593(14) | Cu(4)-I(2)                    | 2.5388(14) | Cu(4)-I(3) <sup>#1</sup>      | 2.6006(14) |
| Cu(1)-Cu(2) <sup>#1</sup>     | 2.7603(18) | Cu(1)-Cu(3) <sup>#1</sup>     | 2.7856(19) | Cu(1)-Cu(4) <sup>#1</sup>     | 2.7410(19) | Cu(2)-Cu(3)                   | 2.7444(19) |
| Cu(2)-Cu(4)                   | 2.7981(19) | Cu(3)-Cu(4)                   | 2.7906(19) |                               |            |                               |            |
| I(3)-Cu(1)-I(1)               | 120.58(5)  | I(3)-Cu(1)-I(2)               | 119.68(5)  | I(1)-Cu(1)-I(2)               | 118.56(5)  | I(3)-Cu(2)-I(2)               | 120.92(5)  |
| I(3)-Cu(2)-I(1) <sup>#1</sup> | 120.12(6)  | I(2)-Cu(2)-I(1) <sup>#1</sup> | 118.41(5)  | I(1)-Cu(3)-I(3)               | 122.00(6)  | I(1)-Cu(3)-I(2) <sup>#1</sup> | 118.36(6)  |
| I(3)-Cu(3)-I(2) <sup>#1</sup> | 119.13(6)  | I(2)-Cu(4)-I(1)               | 120.29(5)  | I(2)-Cu(4)-I(3) <sup>#1</sup> | 120.06(5)  | I(1)-Cu(4)-I(3) <sup>#1</sup> | 119.28(5)  |

Symmetry codes: #1 -x+2,-y,-z+1; #2 -x+1,-y+1,-z

**Table S4 The coordinates of optimized  $(\text{Py}_3\text{P-O-PPy}_3)^{2+}$  cation at B3LPY/6-31g(d) level**

| Atom | x           | y           | z           | Atom | x           | y           | z           |
|------|-------------|-------------|-------------|------|-------------|-------------|-------------|
| P    | -1.62038100 | 0.02737100  | -0.03446000 | C    | 1.58536200  | -2.30864800 | -1.58059500 |
| N    | -2.08507300 | 1.51778300  | 0.43209200  | C    | 3.17545300  | -2.24391000 | 0.30612600  |
| N    | -1.83303700 | -1.02680400 | 1.19186500  | C    | 1.60180600  | 2.34193800  | -1.57252200 |
| O    | -0.03000200 | 0.04469600  | -0.45139300 | C    | 3.58632000  | 0.87668900  | -1.69991700 |
| N    | -2.31195500 | -0.44737900 | -1.43127700 | C    | 2.66325300  | 1.60342300  | 1.87028200  |
| C    | -1.53169500 | 2.25415400  | 1.60911600  | C    | 1.46068300  | -0.40054000 | 2.66938300  |
| C    | -2.95783500 | 2.41312800  | -0.40039400 | H    | -3.25762800 | -2.50281300 | -3.09413100 |
| C    | -1.37484700 | -2.45109600 | 1.11065500  | H    | -4.80409100 | -1.65809200 | -3.26188200 |
| C    | -2.79648000 | -0.84328200 | 2.33025600  | H    | -2.71483200 | -0.71892200 | -4.70808200 |
| P    | 1.56320700  | -0.01568200 | -0.08192000 | H    | -3.67771600 | 0.45515100  | -3.80346700 |
| C    | -3.65619300 | -1.10597800 | -1.48425100 | H    | 0.50119000  | -2.44786800 | -1.58540300 |
| C    | -1.82919100 | -0.09547000 | -2.80512700 | H    | 1.86660700  | -1.74443700 | -2.47787500 |
| H    | -0.45310500 | 2.08764700  | 1.69746600  | C    | 2.36221700  | -3.62892700 | -1.48566600 |
| H    | -2.01339700 | 1.90140400  | 2.52730100  | H    | 3.94148800  | -1.52281200 | 0.60039700  |
| C    | -1.89121400 | 3.71920100  | 1.32087100  | H    | 2.83291000  | -2.77024100 | 1.20384500  |
| H    | -3.87945500 | 1.89942100  | -0.68120900 | C    | 3.65625800  | -3.23402100 | -0.76060900 |
| H    | -2.43137100 | 2.71625800  | -1.31282600 | C    | 2.49877400  | 2.76469700  | -2.74305900 |
| C    | -3.19818100 | 3.61272200  | 0.52263400  | H    | 0.55926000  | 2.18982500  | -1.86146400 |
| C    | -1.90063600 | -3.07489600 | 2.41167200  | H    | 1.63644500  | 3.08210300  | -0.76253000 |
| H    | -0.28598900 | -2.49924500 | 1.02174800  | H    | 4.30961700  | 0.61344300  | -0.92239600 |

|   |             |             |             |   |            |             |             |
|---|-------------|-------------|-------------|---|------------|-------------|-------------|
| H | -1.81327100 | -2.93683300 | 0.23084400  | H | 3.57486400 | 0.07848800  | -2.45012400 |
| H | -3.64730100 | -0.22999900 | 2.02741100  | C | 3.88375600 | 2.24326700  | -2.33413500 |
| H | -2.28553000 | -0.34506300 | 3.16156200  | H | 3.70753100 | 1.47300700  | 1.56825400  |
| C | -3.18069900 | -2.27899300 | 2.70221400  | H | 2.27508300 | 2.50765700  | 1.39625300  |
| N | 2.00682600  | -1.56404600 | -0.34951500 | C | 2.52366000 | 1.63045500  | 3.39800100  |
| N | 2.20795600  | 1.05302500  | -1.13132700 | H | 1.60367600 | -1.46938900 | 2.49565800  |
| N | 1.86353900  | 0.39355800  | 1.46832400  | H | 0.40096700 | -0.22503500 | 2.88993600  |
| H | -4.44642400 | -0.38970900 | -1.22746600 | C | 2.36289200 | 0.15219800  | 3.77922300  |
| H | -3.70322300 | -1.94059200 | -0.78017500 | H | 2.53824400 | -4.06622400 | -2.47139900 |
| C | -3.76358900 | -1.54183500 | -2.94942200 | H | 1.79842500 | -4.35714700 | -0.89195100 |
| H | -1.53685400 | 0.95716800  | -2.86659100 | H | 4.17636600 | -4.08587300 | -0.31557900 |
| H | -0.95675400 | -0.71034700 | -3.04814400 | H | 4.34908100 | -2.74070800 | -1.45144100 |
| C | -3.03064500 | -0.42316800 | -3.70465300 | H | 2.16346100 | 2.28041200  | -3.66675900 |
| H | -1.99645500 | 4.30015000  | 2.24032200  | H | 2.47891700 | 3.84571200  | -2.90143300 |
| H | -1.10978600 | 4.18900900  | 0.71262400  | H | 4.57514900 | 2.15440500  | -3.17546000 |
| H | -3.42962200 | 4.51758400  | -0.04448200 | H | 4.33936100 | 2.91012500  | -1.59410300 |
| H | -4.04096900 | 3.40989000  | 1.19220100  | H | 1.63239800 | 2.19887500  | 3.68762200  |
| H | -1.17341900 | -2.93541400 | 3.21958800  | H | 3.38748400 | 2.10395200  | 3.87075000  |
| H | -2.07634900 | -4.14784300 | 2.30278400  | H | 1.92530700 | 0.00888600  | 4.77025700  |
| H | -3.50517300 | -2.35376300 | 3.74305200  | H | 3.33296800 | -0.35647300 | 3.76331800  |
| H | -4.00362100 | -2.62825200 | 2.06841000  |   |            |             |             |

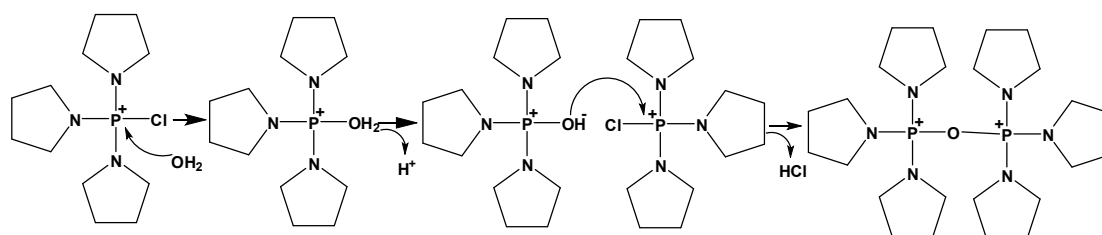

Scheme S1 The possible in - situ generation route of  $(\text{Py}_3\text{P-O-PPy}_3)^{2+}$  under hydrothermal condition

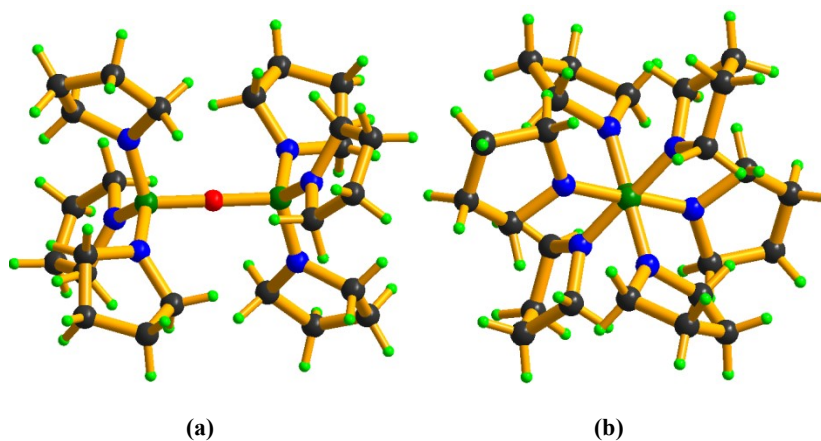

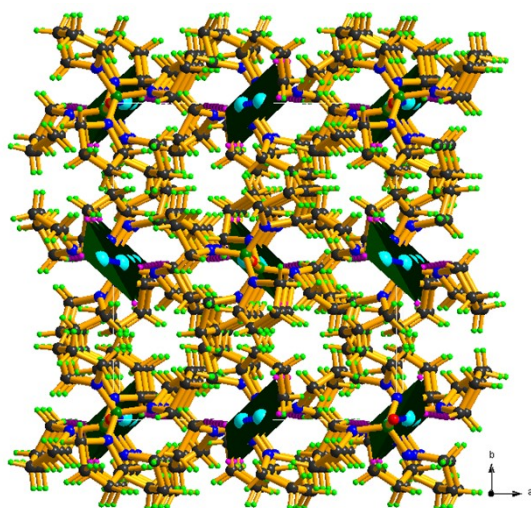

(c)

Fig. S1 (a) the structure of  $(\text{Py}_3\text{P-O-PPy}_3)^{2+}$  cations showing P-O-P backbone; (b) the structure of  $(\text{Py}_3\text{P-O-PPy}_3)^{2+}$  cations showing its staggered form; (c) packing diagram of 1

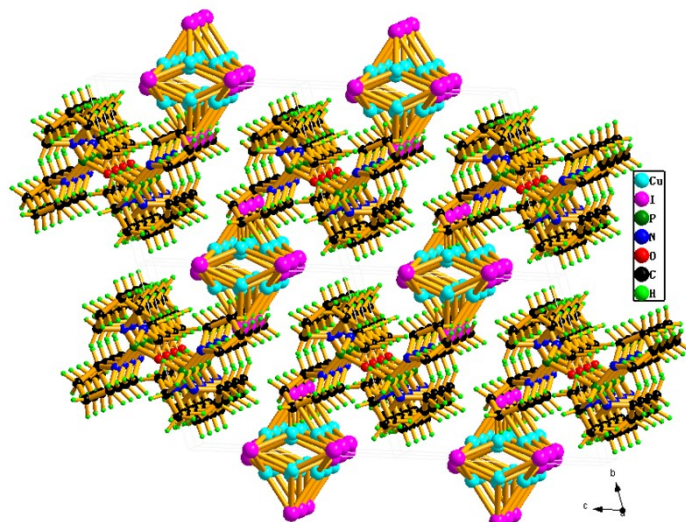

Fig. S2 Packing diagram of 2 without hydrogen bonds

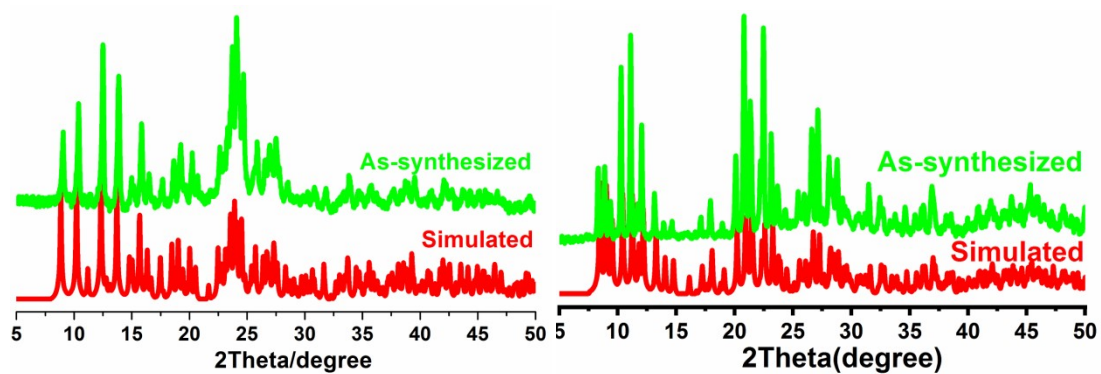

(a)

(b)

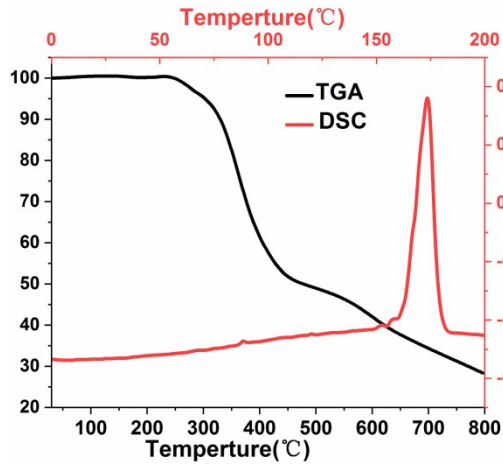

(c)

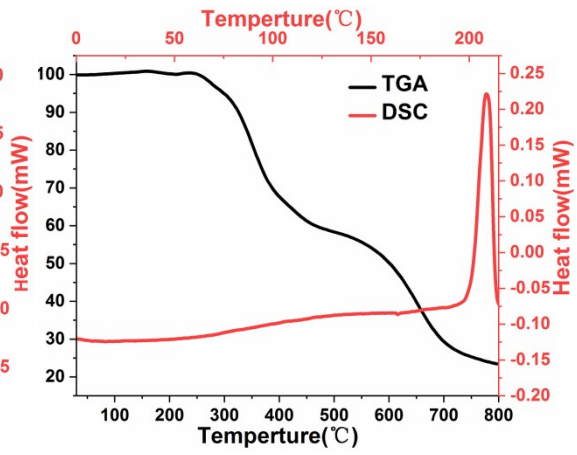

(d)

Fig. S3 The simulated (red) and experimental (green) PXRD of (a) 1; and (b) 2; TGA-DSC curves of (c) 1 and (d) 2

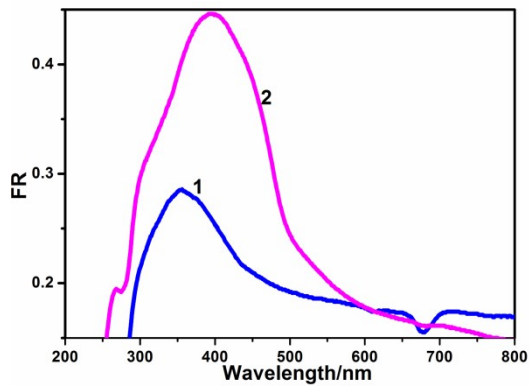

(a)

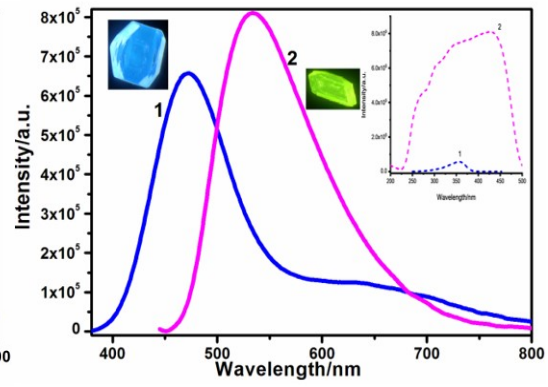

(b)

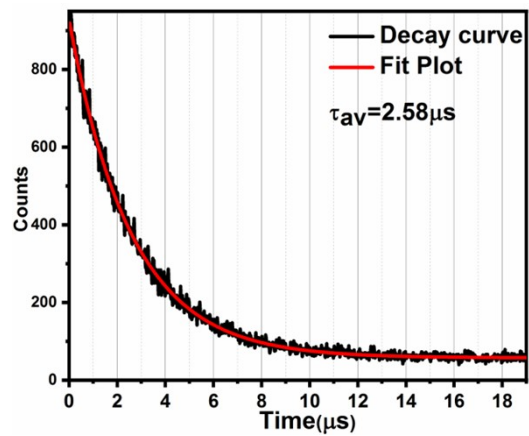

(c)

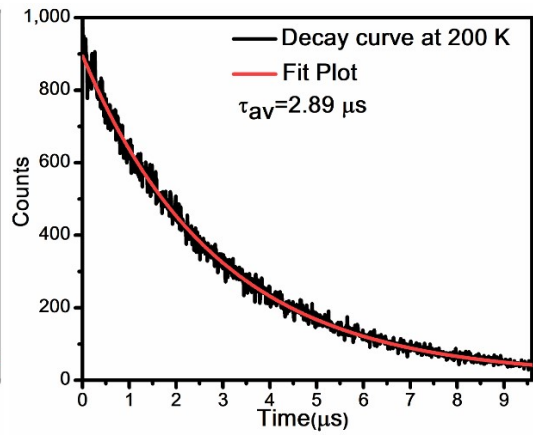

(d)

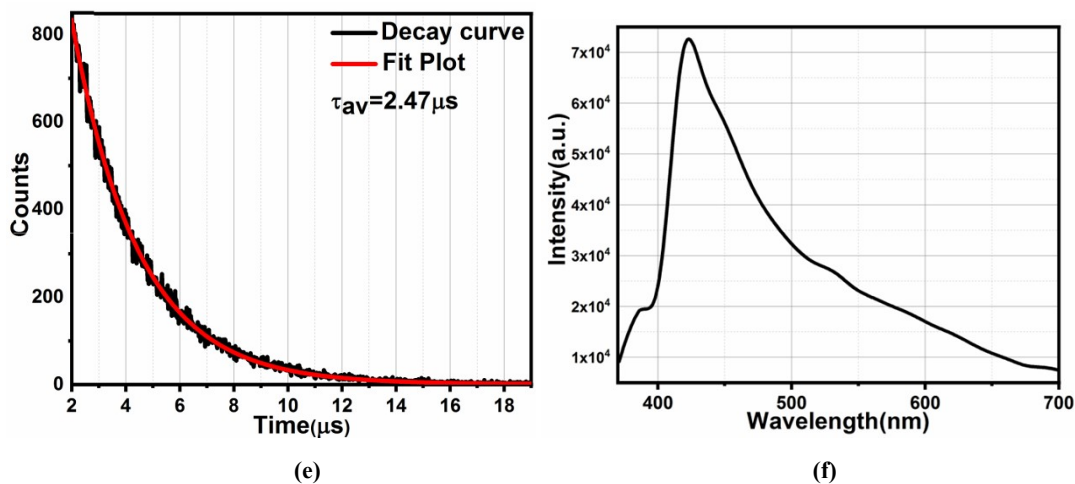

Fig. S4 (a) UV-Vis spectra; (b) emission spectra of two hybrids with inserted excitation spectra: 1-blue ( $\lambda_{ex}=355$  nm); 2-magenta ( $\lambda_{ex}=425$  nm); (c, d) the photoluminescence decay curves (left: 1; right: 1 at 200 K); (e) the photoluminescence decay curve of 2; (f) the luminescent spectrum of  $Py_3PCl \cdot PF_6$  ( $\lambda_{ex}=350$  nm)

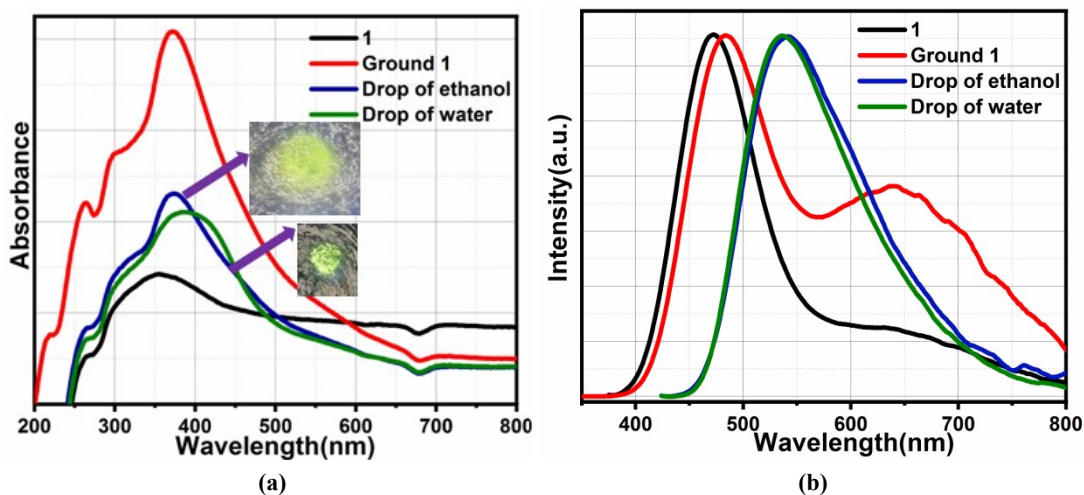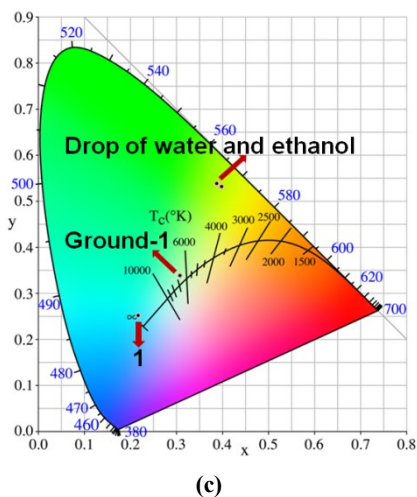

Fig. S5 (a) UV-Vis spectra showing the ground sample treated by adding ethanol and water; (b, c) emission spectra and CIE chromaticity coordinates on various states



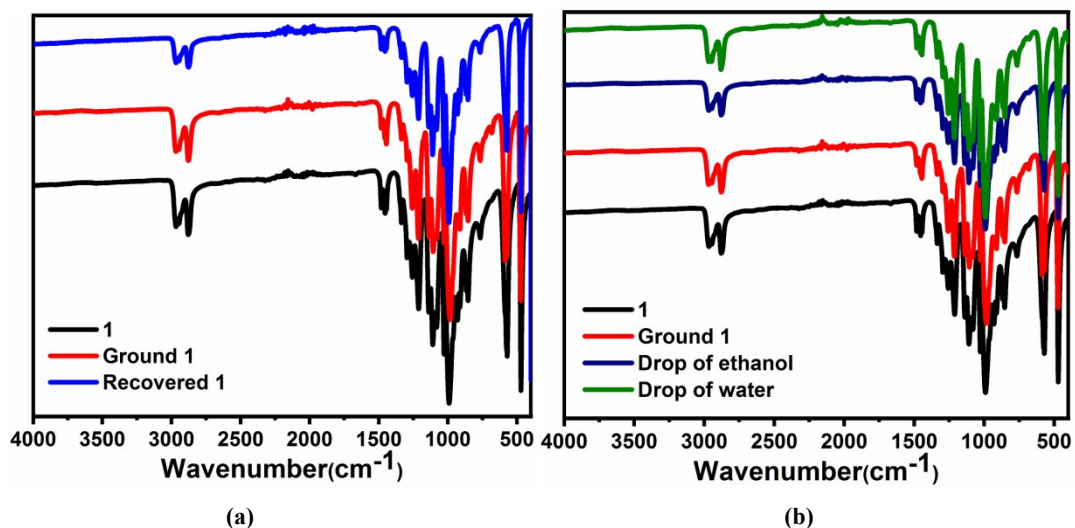

Fig. S6 (a) FT-IR spectra of 1, ground 1 and its recovered one; (b) FT-IR spectra of 1, ground 1 and treated with ethanol and water

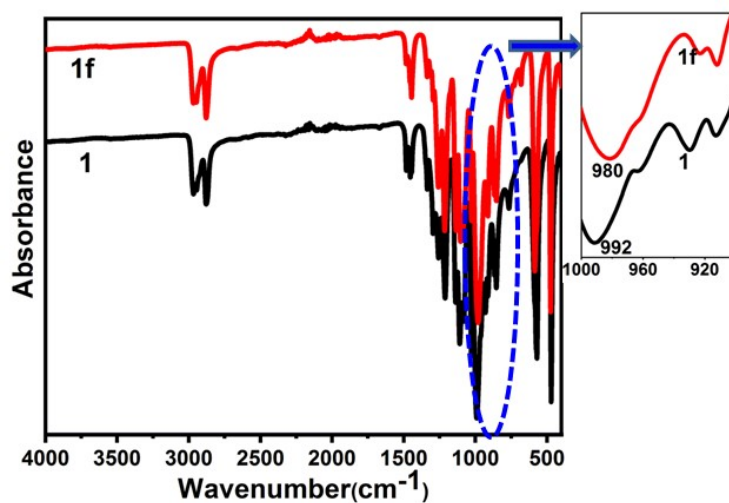

Fig. S7 FT-IR spectra of 1 and 1f

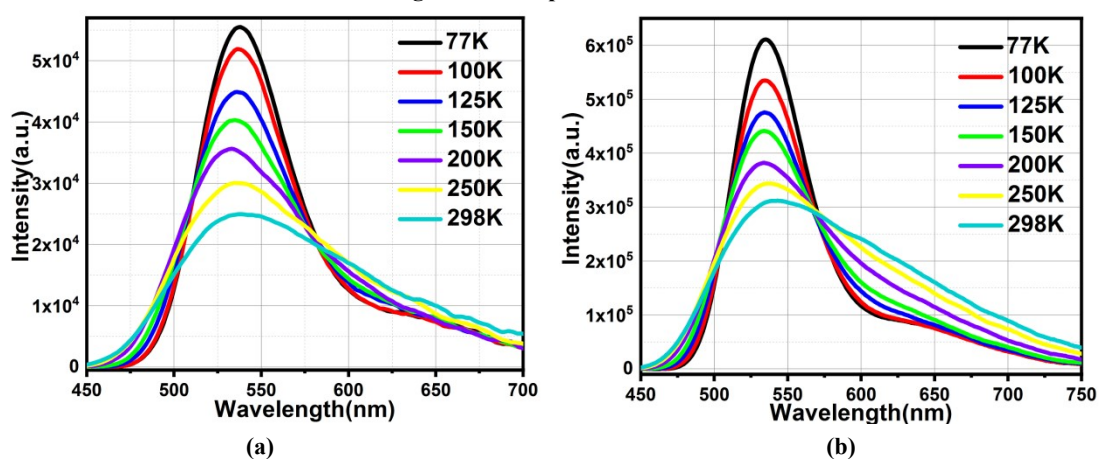

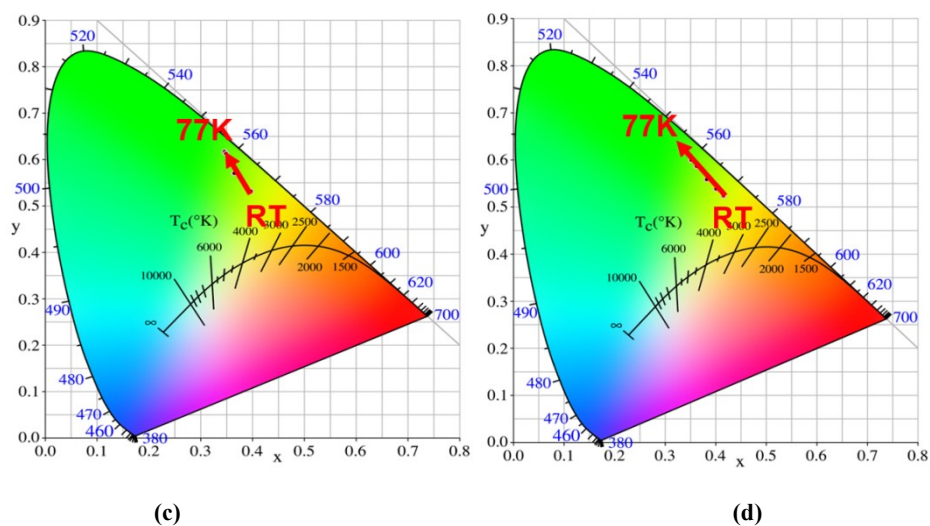

**Fig. S8** Temperature dependent fluorescence and CIE chromaticity coordinate of ground 1 treated by solvents: (a, c) ethanol; (b, d) water
